# Supplementary material
Source: PubMed Central journal article supplement (PMC2896764)
Supplement: mmc1.pdf [file mmc1.pdf]

## Supplemental Data

### Mutations in *C12orf65*

### in Patients with Encephalomyopathy

### and a Mitochondrial Translation Defect

Hana Antonicka, Elsebet Østergaard, Florin Sasarman, Woranontee Weraarpachai, Flemming Wibrand, Anne Marie B. Pedersen, Richard J. Rodenburg, Marjo S. van der Knaap, Jan A.M. Smeitink, Zofia M. Chrzanowska-Lightowlers, and Eric A. Shoubridge

**Table S1. Homozygous Regions Larger than 5 Mb in the DNA of Patient 1**

| Chromosome | SNPs                    | Interval (Mb) |
|------------|-------------------------|---------------|
| 1          | rs1347539 - rs1414904   | 76.69–95.34   |
| 1          | rs10495094 - rs1570105  | 214.51–230.74 |
| 1          | rs1072320 - rs1892445   | 236.31–qter   |
| 3          | rs1112189 - rs1421165   | 144.51–179.11 |
| 6          | rs6911727 - rs449159    | 9.06–14.97    |
| 8          | rs10488368 - rs10503691 | Pter–20.67    |
| 11         | rs1486911 - rs10502234  | 110.26–119.41 |
| 12         | rs1106349 - rs10492049  | 117.35–125.52 |
| 15         | rs1532517 - rs1672407   | 22.08–29.23   |
| 16         | rs10500362 - rs1898680  | 8.14–13.18    |
| 16         | rs10521238 - rs10514487 | 50.12–78.74   |
| 17         | rs10521195 - rs63953    | 12.10–28.68   |
| 20         | rs4142363 - rs4811374   | 10.98–50.71   |
| 21         | rs2835256 - rs10483083  | 36.34–qter    |
